# Supplementary material for: Transferability of Alzheimer Disease Polygenic Risk Score Across Populations and Its Association With Alzheimer Disease-Related Phenotypes
Source: PubMed Central journal article supplement (PMC9856322; doi:10.1001/jamanetworkopen.2022.47162), 2022-12-15
Supplement: jamanetwopen-e2247162-s001.pdf [file jamanetwopen-e2247162-s001.pdf]

## Supplemental Online Content

Jung S-H, Kim H-R, Chun MY, et al. Transferability of Alzheimer disease polygenic risk score across populations and its association with Alzheimer disease-related phenotypes. *JAMA Netw Open*. 2022;5(12):e2247162.  
doi:10.1001/jamanetworkopen.2022.47162

### **eMethods.**

**eTable 1.** Thirty-nine SNVs Used in the Best-fit PRS

**eTable 2.** Demographics of the Participants According to the PRS Quantiles

**eTable 3.** Characteristics of SNVs Selected for Transancestry PRS

**eTable 4.** Characteristics of SNVs Selected for Japanese-based PRS

**eTable 5.** Predictive Accuracy of PRSs Derived From European, Japanese, and Transancestry Meta-GWAS

**eFigure 1.** Principal Component Analysis Comparison of the Korean Study Cohorts and the 1000 Genomes Project Populations

**eFigure 2.** PRS Distributions Among the Study Participants According to the Genotyping Arrays

**eFigure 3.** Distribution Plots for Nagelkerke's  $R^2$  Values of Each Population-based PRS Across the SNP Selection Thresholds

**eFigure 4.** Quantile-quantile Plot and Miami Plot for the Transancestry Meta-GWAS

### **eReferences.**

This supplemental material has been provided by the authors to give readers additional information about their work.

## **eMethods.**

### **eMethod 1.** Genotyping, imputation, and quality control criteria.

Quality control (QC) was performed for both types of single-nucleotide polymorphism (SNP) data. SNVs were removed using the following criteria: (i) call rate of <98%, (ii) minor allele frequency (MAF) of <1%, or (iii) genotype frequencies significantly deviating from the Hardy–Weinberg equilibrium with a *P* value of <10<sup>-6</sup>. After QC, the genotype data were imputed to estimate genotypes for variants that were not directly genotyped and to combine datasets of different genotyping arrays (ASA chip and KBA chip). Imputation was conducted using the Minimac4 software with all available reference haplotypes from the Haplotype Reference Consortium (HRC-r1.1 2016) at the University of Michigan Imputation Server. Consequently, we performed post-imputation QC with (i) an MAF of <1% or (ii) a low imputation quality ( $R^2 < 0.8$  for imputed SNVs). To verify the appropriate combination of the two genotype datasets, we performed principal component analysis (PCA) using EIGENSTRAT [1]. We also conducted PCA for 1000 Genomes Project samples, and projected the two genotyped datasets to the PCA plot to confirm the ancestral distinction.

Based on the genotype data, participants were excluded in accordance with the following criteria: (i) call rate of <95%, (ii) sex mismatch, (iii) heterozygosity excess ( $\pm 5$  standard deviations from the mean), or (iv) one of the related pairs of individuals with second-degree or closer relationships estimated using the KING software [2].

**eMethod 2.** Amyloid positron emission tomography acquisition.

A $\beta$  PET images were obtained using a Discovery STE PET/computed tomography scanner (GE Medical Systems, Milwaukee, WI, USA). PET images were acquired for 20 min, starting at 90 min after intravenous injection of either 18F-florbetaben or 18F-flutemetamol. A $\beta$  positivity or negativity was determined by well-trained nuclear physicians using visual assessments for florbetaben or flutemetamol PET [3, 4]. Positivity for tracer uptake was assessed in four cortical regions (lateral temporal, frontal, parietal, and posterior cingulate cortices) for florbetaben PET and five regions (lateral temporal, frontal, parietal, posterior cingulate cortices, and striatum) for flutemetamol PET. Amyloid PET positivity was defined as having at least one cortical region with evidence of a positive uptake.

### **eMethod 3.** Polygenic risk score generation.

To generate the best polygenic risk score (PRS) model  $P$  values and effect sizes from the summary statistics were used in the dataset 1 (Korean population of 554 Alzheimer's disease dementia (ADD) cases and 479 cognitively unimpaired (CU) controls). Briefly, the PRS for each participant was generated from the sum of the effect sizes from all associated alleles included in the best model. To derive the best model, we tested the inclusion of SNVs from a range of  $P$  value thresholds ( $5 \times 10^{-8}$ –1.0) from the genome-wide association study conducted by Kunkle et al [5]. Further, we tested a range of linkage disequilibrium-based clumping  $r^2$  (0.1–0.9) within 1,000 kb to examine which thresholds resulted in the largest Nagelkerke's  $R^2$  value, calculated from the logistic regression. Subsequently, we used the same SNVs and weights to replicate the association of the PRS in a dataset 2 of 379 samples (159 ADD cases and 220 CU controls) and in the dataset 1 of 222 patients with amnesic mild cognitive impairment. The overview of the study is shown in Fig. 1.

**eTable 1.** Thirty-nine SNVs used in the best-fit PRS.

| CHR | SNP        | Nearest gene         | EA | Europe an <sup>1</sup> | East Asian <sup>1</sup> | European GWAS (IGAP) [5] |                 | Korean (our dataset 1) |                 |
|-----|------------|----------------------|----|------------------------|-------------------------|--------------------------|-----------------|------------------------|-----------------|
|     |            |                      |    | EAF                    | EAF                     | Beta <sup>2</sup>        | SE <sup>2</sup> | Beta <sup>3</sup>      | SE <sup>3</sup> |
| 10  | rs12358692 | <i>RP11-138118.1</i> | T  | 0.6572                 | 0.3264                  | 0.6429                   | 0.0154          | 0.0133                 | 0.0828          |
| 11  | rs11218343 | <i>SORL1</i>         | T  | 0.9611                 | 0.7023                  | 0.2053                   | 0.0369          | 0.0936                 | 0.0826          |
| 2   | rs6733839  | <i>BINI</i>          | T  | 0.3921                 | 0.4363                  | 0.1693                   | 0.0154          | 0.0048                 | 0.0759          |
| 1   | rs679515   | <i>CR1</i>           | T  | 0.1988                 | 0.0284                  | 0.1508                   | 0.0183          | 0.1816                 | 0.2186          |
| 1   | rs1752684  | <i>CR1</i>           | A  | 0.2037                 | 0.3526                  | 0.1432                   | 0.0178          | 0.0241                 | 0.0789          |
| 20  | rs6014724  | <i>CASS4</i>         | A  | 0.9095                 | 0.6311                  | 0.1319                   | 0.0259          | 0.0474                 | 0.0796          |
| 3   | rs6805148  | <i>CLEC3B</i>        | A  | 0.9109                 | 0.9188                  | 0.1293                   | 0.0257          | 0.0455                 | 0.1387          |
| 8   | rs1532276  | <i>CLU</i>           | T  | 0.3919                 | 0.2031                  | -0.1266                  | 0.0154          | -0.0834                | 0.0901          |
| 11  | rs1582763  | <i>MS4A6A</i>        | A  | 0.3593                 | 0.1330                  | -0.1232                  | 0.0149          | -0.0215                | 0.0980          |
| 14  | rs17125924 | <i>FERMT2</i>        | A  | 0.0954                 | 0.2262                  | 0.1222                   | 0.0246          | 0.0298                 | 0.0889          |
| 2   | rs35832505 | <i>BINI</i>          | T  | 0.1662                 | 0.0562                  | 0.1213                   | 0.019           | 0.0318                 | 0.1419          |
| 11  | rs3851179  | <i>PICALM</i>        | T  | 0.3542                 | 0.4103                  | -0.1198                  | 0.0148          | -0.0433                | 0.0783          |
| 2   | rs35695568 | <i>RPL21P3 2</i>     | T  | 0.0963                 | 0.1247                  | 0.1152                   | 0.0247          | 0.0645                 | 0.1130          |
| 11  | rs56201148 | <i>MS4A6A</i>        | T  | 0.3823                 | 0.2189                  | -0.1137                  | 0.0146          | -0.0955                | 0.0965          |
| 19  | rs12151021 | <i>ABCA7</i>         | A  | 0.6795                 | 0.5081                  | -0.1071                  | 0.0169          | -0.0267                | 0.0737          |
| 7   | rs11767557 | <i>EPHA1-ASI</i>     | T  | 0.7989                 | 0.1401                  | 0.1028                   | 0.0182          | 0.0759                 | 0.1068          |
| 11  | rs67472071 | <i>SPI1</i>          | A  | 0.3396                 | 0.3026                  | -0.0981                  | 0.0152          | -0.0281                | 0.0773          |
| 19  | rs3795065  | <i>ABCA7</i>         | T  | 0.3498                 | 0.2548                  | 0.0968                   | 0.0171          | -0.0152                | 0.0908          |
| 16  | rs3752786  | <i>MTSS2</i>         | A  | 0.2213                 | 0.1324                  | 0.0964                   | 0.0209          | 0.0354                 | 0.1038          |
| 8   | rs73223431 | <i>PTK2B</i>         | T  | 0.3352                 | 0.2991                  | 0.0936                   | 0.0153          | -0.0211                | 0.0906          |
| 14  | rs11623019 | <i>SLC24A4</i>       | T  | 0.8066                 | 0.5553                  | -0.0913                  | 0.0174          | -0.0615                | 0.0773          |
| 14  | rs12590654 | <i>SLC24A4</i>       | A  | 0.3429                 | 0.4640                  | -0.0906                  | 0.0157          | -0.0668                | 0.0772          |
| 11  | rs11039165 | <i>MADD</i>          | A  | 0.2668                 | 0.0244                  | 0.0894                   | 0.0158          | -0.0139                | 0.2328          |
| 16  | rs28482811 | <i>GPRC5B</i>        | T  | 0.8400                 | 0.7329                  | 0.0872                   | 0.0189          | 0.0443                 | 0.0894          |
| 6   | rs3135348  | <i>BTNL2</i>         | A  | 0.4198                 | 0.3705                  | 0.0837                   | 0.0150          | -0.0026                | 0.0818          |
| 6   | rs9381563  | <i>AL35535 3.1</i>   | T  | 0.3550                 | 0.1979                  | 0.0821                   | 0.0148          | 0.0298                 | 0.0977          |
| 6   | rs9268112  | <i>TSBP1-ASI</i>     | A  | 0.3256                 | 0.2629                  | 0.0815                   | 0.0159          | -0.0208                | 0.0981          |
| 19  | rs3865444  | <i>SIGLEC2 2P</i>    | A  | 0.3212                 | 0.1733                  | -0.0804                  | 0.0158          | 0.0035                 | 0.0947          |

|    |            |                  |   |        |        |         |        |         |        |
|----|------------|------------------|---|--------|--------|---------|--------|---------|--------|
| 11 | rs11230227 | <i>MS4A4E</i>    | A | 0.3804 | 0.2584 | 0.0792  | 0.0153 | 0.0162  | 0.0843 |
| 6  | rs9271375  | <i>HLA-DRBI</i>  | A | 0.4850 | 0.6226 | -0.0789 | 0.0157 | -0.0261 | 0.0820 |
| 11 | rs2293579  | <i>PSMC3</i>     | A | 0.3868 | 0.3743 | 0.0771  | 0.0145 | -0.0644 | 0.0825 |
| 8  | rs7831810  | <i>GULOP</i>     | A | 0.5860 | 0.4013 | -0.0765 | 0.0146 | -0.0343 | 0.0793 |
| 5  | rs11168036 | <i>PFDNI</i>     | T | 0.4918 | 0.4339 | 0.0754  | 0.0143 | 0.0734  | 0.0768 |
| 11 | rs598561   | <i>SLC25A1PI</i> | A | 0.4873 | 0.0963 | 0.0747  | 0.0143 | 0.0508  | 0.1088 |
| 21 | rs3017432  | <i>ADAMTS1</i>   | T | 0.6033 | 0.2664 | 0.0735  | 0.0151 | 0.0481  | 0.0825 |
| 17 | rs2526378  | <i>BZRAP1</i>    | A | 0.5449 | 0.4696 | -0.0717 | 0.0145 | 0.0026  | 0.0764 |
| 19 | rs8111708  | <i>ELL</i>       | A | 0.3562 | 0.2523 | 0.0696  | 0.0151 | 0.0667  | 0.0869 |
| 7  | rs7805776  | <i>EPHA1-ASI</i> | A | 0.5248 | 0.3732 | -0.0695 | 0.0148 | -0.0237 | 0.0776 |
| 6  | rs12197146 | <i>CD2AP</i>     | T | 0.5127 | 0.8269 | 0.0674  | 0.0144 | 0.0164  | 0.0933 |

<sup>1</sup>EAF for non-Finnish EUR and EAS samples from the Genome Aggregation Database (gnomAD version 2.1.1, <https://gnomad.broadinstitute.org>)

Statistical values were obtained from <sup>2</sup>a previous study [5] and <sup>3</sup>our dataset 1.

Abbreviations: IGAP, International Genomics of Alzheimer's Project; CHR, chromosome; SNP, single-nucleotide polymorphism; SE, standard error; EA, effective allele; EAF, effective allele frequency; PRS, polygenic risk score

**eTable 2.** Demographics of the participants according to the PRS quantiles.

|                                               | <b>Low PRS group<br/>(n=314)</b> | <b>Intermediate PRS group<br/>(n=314)</b> | <b>High PRS group<br/>(n=314)</b> | <b>Very high PRS group<br/>(n=313)</b> | <b><i>P</i></b> |
|-----------------------------------------------|----------------------------------|-------------------------------------------|-----------------------------------|----------------------------------------|-----------------|
| <b>Age, mean (SD), y</b>                      | 72.6 (8.9)                       | 72.6 (8.8)                                | 71.9 (9.1)                        | 71.7 (8.7)                             | .15             |
| <b>Education, mean (SD), y</b>                | 11.2 (4.9)                       | 10.9 (5.0)                                | 10.7 (5.1)                        | 11.1 (4.9)                             | .76             |
| <b>Sex</b>                                    |                                  |                                           |                                   |                                        | .22             |
| <b>Female, No. (%)</b>                        | 172 (54.8)                       | 182 (58.0)                                | 197 (62.7)                        | 188 (60.1)                             |                 |
| <b>Male, No. (%)</b>                          | 142 (45.2)                       | 132 (42.0)                                | 117 (37.3)                        | 125 (39.9)                             |                 |
| <b><i>APOE</i> ε4 carrier, No. (%)</b>        | 117 (37.3)                       | 129 (41.1)                                | 132 (42.0)                        | 133 (42.5)                             | .53             |
| <b>Amyloid positivity, No. (%)</b>            | 139/304 (45.7)                   | 161/303 (53.1)                            | 169/304 (55.6)                    | 181/303 (59.7)                         | .005            |
| <b>Age at ADD symptom onset, mean (SD), y</b> | 69.0 (9.9)                       | 68.1 (9.8)                                | 66.5 (10.4)                       | 65.3 (9.7)                             | .01             |
| <b>Diagnosis, No. (%)</b>                     |                                  |                                           |                                   |                                        | .005            |
| <b>CU, No. (%)</b>                            | 150 (47.8)                       | 115 (36.6)                                | 112 (35.7)                        | 102 (32.6)                             |                 |
| <b>aMCI, No. (%)</b>                          | 51 (16.2)                        | 59 (18.8)                                 | 53 (16.9)                         | 59 (18.8)                              |                 |
| <b>ADD, No. (%)</b>                           | 113 (36.0)                       | 140 (44.6)                                | 149 (47.5)                        | 152 (48.6)                             |                 |

*P* values were obtained using the chi-square test for categorical variables and analysis of variance for continuous variables.

Abbreviations: CU, cognitively unimpaired; aMCI, amnesic mild cognitive impairment; ADD, Alzheimer’s disease dementia; PRS, polygenic risk score; SD, standard deviation.

**eTable 3.** Characteristics of SNVs selected for trans-ancestry PRS.

| CHR | SNP         | Nearest gene      | EA | Trans-ancestry meta-GWAS |                 | European GWAS (IGAP) [5] |                 |                                         | Japanese GWAS (NCGG) [6] |                 | Korean (our dataset 1) |                                         |                   |
|-----|-------------|-------------------|----|--------------------------|-----------------|--------------------------|-----------------|-----------------------------------------|--------------------------|-----------------|------------------------|-----------------------------------------|-------------------|
|     |             |                   |    | Beta <sup>1</sup>        | SE <sup>1</sup> | Beta <sup>2</sup>        | SE <sup>2</sup> | <sup>4</sup> Proportion of SNP's weight | Beta <sup>2</sup>        | SE <sup>2</sup> |                        | <sup>4</sup> Proportion of SNP's weight | Beta <sup>3</sup> |
| 16  | rs56983910  | <i>UNGP1</i>      | T  | -0.3818                  | 0.0915          | -0.3818                  | 0.0889          | 100.00%                                 | -                        | -               | -                      | -0.1421                                 | 0.3074            |
| 4   | rs12640503  | <i>LINC02283</i>  | A  | 0.1096                   | 0.0602          | -                        | -               | -                                       | 0.1096                   | 0.0588          | 100.00%                | 0.0344                                  | 0.3319            |
| 11  | rs117807585 | <i>SORL1</i>      | A  | -0.2335                  | 0.0322          | -0.1895                  | 0.0499          | 39.46%                                  | -0.1137                  | 0.0403          | 60.54%                 | -0.2559                                 | 0.2087            |
| 1   | rs142802245 | <i>SERINC2</i>    | A  | 0.0944                   | 0.0506          | -                        | -               | -                                       | 0.0944                   | 0.0494          | 100.00%                | -0.0478                                 | 0.2504            |
| 11  | rs76367405  | <i>SORL1</i>      | A  | 0.2116                   | 0.0501          | 0.2116                   | 0.0487          | 100.00%                                 | -                        | -               | -                      | -0.1997                                 | 0.4440            |
| 10  | rs138604348 | <i>IPMK</i>       | A  | 0.1805                   | 0.0423          | 0.1805                   | 0.0411          | 100.00%                                 | -                        | -               | -                      | -0.6043                                 | 0.9234            |
| 2   | rs6733839   | <i>SORL1</i>      | T  | 0.1693                   | 0.0159          | 0.1693                   | 0.0154          | 100.00%                                 | -                        | -               | -                      | 0.0109                                  | 0.1749            |
| 11  | rs2101756   | <i>SORL1</i>      | A  | 0.0725                   | 0.0407          | -                        | -               | -                                       | 0.0725                   | 0.0398          | 100.00%                | 0.2922                                  | 0.1941            |
| 1   | rs679515    | <i>CRI</i>        | T  | 0.1523                   | 0.0184          | 0.1508                   | 0.0183          | 95.31%                                  | 0.0795                   | 0.0825          | 4.69%                  | 0.4181                                  | 0.5033            |
| 1   | rs6697005   | <i>CRI</i>        | A  | -0.1416                  | 0.0188          | -0.1416                  | 0.0183          | 100.00%                                 | -                        | -               | -                      | -0.0257                                 | 0.1844            |
| 6   | rs1497525   | <i>OR2B2</i>      | A  | 0.1348                   | 0.0294          | 0.1153                   | 0.0353          | 65.46%                                  | 0.0745                   | 0.0486          | 34.54%                 | -0.0328                                 | 0.3204            |
| 20  | rs6014724   | <i>CASS4</i>      | A  | 0.1319                   | 0.0267          | 0.1319                   | 0.0259          | 100.00%                                 | -                        | -               | -                      | 0.1091                                  | 0.1833            |
| 8   | rs1532276   | <i>CLU</i>        | T  | -0.1271                  | 0.0146          | -0.1266                  | 0.0154          | 85.36%                                  | -0.0564                  | 0.0372          | 14.64%                 | -0.1920                                 | 0.2076            |
| 6   | rs9275098   | <i>HLA-DQB1</i>   | T  | -0.1237                  | 0.0245          | -0.1292                  | 0.0262          | 82.93%                                  | -0.0422                  | 0.0578          | 17.07%                 | -0.1615                                 | 0.2847            |
| 11  | rs3851179   | <i>PICALM</i>     | T  | -0.1234                  | 0.0140          | -0.1198                  | 0.0148          | 84.24%                                  | -0.0618                  | 0.0342          | 15.76%                 | -0.0997                                 | 0.1803            |
| 3   | rs7618668   | <i>CLEC3B</i>     | A  | -0.1220                  | 0.0250          | -0.1297                  | 0.0258          | 88.94%                                  | -0.0263                  | 0.0732          | 11.06%                 | -0.1047                                 | 0.3193            |
| 2   | rs35832505  | <i>BINI</i>       | T  | -0.1213                  | 0.0196          | -0.1213                  | 0.0190          | 100.00%                                 | -                        | -               | -                      | -0.0733                                 | 0.3267            |
| 5   | rs1001530   | <i>FAM193B-DT</i> | A  | -0.1210                  | 0.0271          | -0.1373                  | 0.0342          | 59.65%                                  | -0.0422                  | 0.0416          | 40.35%                 | -0.1458                                 | 0.2133            |
| 11  | rs1582763   | <i>MS444E</i>     | A  | -0.1122                  | 0.0145          | -0.1232                  | 0.0149          | 89.43%                                  | -0.0088                  | 0.0433          | 10.57%                 | -0.0496                                 | 0.2256            |



|    |            |                                           |   |         |        |         |        |         |         |        |        |         |        |
|----|------------|-------------------------------------------|---|---------|--------|---------|--------|---------|---------|--------|--------|---------|--------|
| 19 | rs12151021 | <i>ABCA7</i>                              | A | 0.1071  | 0.0174 | 0.1071  | 0.0169 | 100.00% | -       | -      | -      | 0.0616  | 0.1696 |
| 14 | rs8016766  | <i>TEX22</i>                              | T | -0.1042 | 0.0253 | -0.1042 | 0.0246 | 100.00% | -       | -      | -      | -0.0825 | 0.1741 |
| 7  | rs75045569 | <i>EPHA1-ASI</i>                          | T | 0.1040  | 0.0201 | 0.1040  | 0.0195 | 100.00% | -       | -      | -      | 0.2760  | 0.3120 |
| 14 | rs74825460 | <i>FERMT2</i><br>,<br><i>LOC105370500</i> | T | 0.0984  | 0.0213 | 0.1200  | 0.0246 | 71.05%  | 0.0199  | 0.0385 | 28.95% | 0.0686  | 0.2041 |
| 11 | rs7926954  | <i>LINC02705</i>                          | A | -0.0979 | 0.0143 | -0.1126 | 0.0146 | 90.48%  | 0.0175  | 0.0450 | 9.52%  | -0.2449 | 0.2210 |
| 14 | rs12590273 | <i>SLC24A4</i>                            | T | 0.0974  | 0.0216 | 0.0935  | 0.0215 | 94.92%  | 0.0732  | 0.0929 | 5.08%  | 0.2885  | 0.4238 |
| 11 | rs11605348 | <i>NDUFS3</i><br>,<br><i>FAM180B</i>      | A | -0.0968 | 0.0160 | -0.0968 | 0.0155 | 100.00% | -       | -      | -      | -0.1146 | 0.1862 |
| 19 | rs3795065  | <i>ABCA7</i>                              | T | -0.0968 | 0.0176 | -0.0968 | 0.0171 | 100.00% | -       | -      | -      | 0.0350  | 0.2091 |
| 16 | rs3752786  | <i>MTSS2</i>                              | A | -0.0964 | 0.0215 | -0.0964 | 0.0209 | 100.00% | -       | -      | -      | -0.0816 | 0.2389 |
| 4  | rs13101577 | <i>LINC02498</i>                          | A | -0.0942 | 0.0210 | -0.0922 | 0.0227 | 81.05%  | -0.0445 | 0.0470 | 18.95% | -0.0779 | 0.2253 |
| 12 | rs7962629  | <i>C1S</i>                                | A | 0.0922  | 0.0201 | 0.0867  | 0.0206 | 90.30%  | 0.0620  | 0.0629 | 9.70%  | -0.1740 | 0.3250 |
| 6  | rs9389138  | <i>SLC2A12</i>                            | T | -0.0922 | 0.0221 | -0.0978 | 0.0221 | 94.60%  | 0.0020  | 0.0925 | 5.40%  | -0.0266 | 0.4607 |
| 2  | rs6605277  | <i>INPP5D</i>                             | A | 0.0921  | 0.0209 | 0.0921  | 0.0203 | 100.00% | -       | -      | -      | -0.0917 | 0.2333 |
| 6  | rs3132963  | <i>TSBP1</i> ,<br><i>TSBP1-ASI</i>        | A | -0.0919 | 0.0204 | -0.0919 | 0.0198 | 100.00% | -       | -      | -      | 0.3855  | 0.5383 |
| 6  | rs9270824  | <i>HLA-DRB1</i>                           | T | 0.0916  | 0.0175 | 0.0916  | 0.0170 | 100.00% | -       | -      | -      | -0.0458 | 0.2038 |
| 8  | rs28834970 | <i>PTK2B</i>                              | T | -0.0909 | 0.0148 | -0.0921 | 0.0153 | 87.95%  | -0.0358 | 0.0413 | 12.05% | 0.0735  | 0.2092 |
| 14 | rs12590654 | <i>SLC24A4</i>                            | A | -0.0906 | 0.0162 | -0.0906 | 0.0157 | 100.00% | -       | -      | -      | -0.1539 | 0.1779 |
| 17 | rs61182333 | <i>SCIMP</i> ,<br><i>ZNF594-DT</i>        | T | 0.0874  | 0.0212 | 0.0874  | 0.0206 | 100.00% | -       | -      | -      | 0.0917  | 0.2568 |
| 2  | rs17014923 | <i>BINI</i>                               | T | -0.0870 | 0.0184 | -0.0863 | 0.0189 | 89.23%  | -0.0404 | 0.0544 | 10.77% | 0.1501  | 0.2680 |

|    |             |                                   |   |         |        |         |        |         |         |        |        |         |        |
|----|-------------|-----------------------------------|---|---------|--------|---------|--------|---------|---------|--------|--------|---------|--------|
| 16 | rs12102869  | <i>GPRC5B</i>                     | T | 0.0870  | 0.0195 | 0.0870  | 0.0189 | 100.00% | -       | -      | -      | 0.1101  | 0.2073 |
| 11 | rs11039165  | <i>MADD</i>                       | A | -0.0865 | 0.0162 | -0.0894 | 0.0158 | 99.16%  | 0.1114  | 0.1712 | 0.84%  | 0.0320  | 0.5361 |
| 6  | rs4335021   | <i>BTNL2</i>                      | T | 0.0859  | 0.0147 | 0.0850  | 0.0155 | 84.97%  | 0.0394  | 0.0369 | 15.03% | 0.0760  | 0.2141 |
| 10 | rs12358692  | <i>LOC105376412, LOC105376413</i> | T | 0.0841  | 0.0159 | 0.0841  | 0.0154 | 100.00% | -       | -      | -      | 0.0305  | 0.1907 |
| 3  | rs4574296   | <i>LOC102723364</i>               | A | 0.0840  | 0.0200 | 0.1013  | 0.0223 | 76.33%  | 0.0124  | 0.0400 | 23.67% | 0.0742  | 0.2047 |
| 6  | rs9381563   | <i>AL355353.1</i>                 | T | -0.0821 | 0.0152 | -0.0821 | 0.0148 | 100.00% | -       | -      | -      | -0.0686 | 0.2250 |
| 19 | rs3865444   | <i>CD33</i>                       | A | -0.0804 | 0.0163 | -0.0804 | 0.0158 | 100.00% | -       | -      | -      | 0.0080  | 0.2181 |
| 1  | rs61833519  | <i>LOC343508</i>                  | T | 0.0800  | 0.0191 | 0.0800  | 0.0186 | 100.00% | -       | -      | -      | 0.0175  | 0.2865 |
| 19 | rs113704219 | <i>TMEM259</i>                    | T | -0.0797 | 0.0193 | -0.0764 | 0.0198 | 89.58%  | -0.0467 | 0.0581 | 10.42% | -0.0807 | 0.3158 |
| 11 | rs11230227  | <i>MS4A4E</i>                     | A | 0.0792  | 0.0157 | 0.0792  | 0.0153 | 100.00% | -       | -      | -      | 0.0373  | 0.1941 |
| 7  | rs1989834   | <i>LOC101928012</i>               | T | -0.0790 | 0.0187 | -0.0793 | 0.0188 | 93.74%  | -0.0326 | 0.0727 | 6.26%  | -0.0742 | 0.3104 |
| 14 | rs1680666   | <i>LOC107987210</i>               | T | 0.0789  | 0.0179 | 0.0789  | 0.0174 | 100.00% | -       | -      | -      | -0.1542 | 0.1714 |
| 14 | rs941648    | <i>SLC24A4</i>                    | A | -0.0775 | 0.0152 | -0.0829 | 0.0165 | 80.41%  | -0.0241 | 0.0334 | 19.59% | -0.1510 | 0.1768 |
| 10 | rs10748526  | <i>TSPAN14</i>                    | T | -0.0773 | 0.0172 | -0.0775 | 0.0179 | 87.23%  | -0.0330 | 0.0468 | 12.77% | -0.0159 | 0.2447 |
| 13 | rs9520713   | <i>NALF1</i>                      | A | -0.0769 | 0.0166 | -0.0730 | 0.0166 | 94.43%  | -0.0616 | 0.0683 | 5.57%  | 0.3228  | 0.4013 |
| 17 | rs2526378   | <i>BZRAP1</i>                     | A | 0.0767  | 0.0137 | 0.0717  | 0.0145 | 84.05%  | 0.0446  | 0.0333 | 15.95% | -0.0060 | 0.1759 |
| 11 | rs598561    | <i>SLC25A1PI</i>                  | A | 0.0766  | 0.0140 | 0.0747  | 0.0143 | 90.35%  | 0.0410  | 0.0438 | 9.65%  | 0.1169  | 0.2505 |
| 4  | rs11520553  | <i>RNA5SP527</i>                  | T | 0.0759  | 0.0179 | 0.0716  | 0.0181 | 92.43%  | 0.0558  | 0.0632 | 7.57%  | 0.4329  | 0.2900 |
| 15 | rs72749540  | <i>EFL1</i>                       | A | 0.0758  | 0.0163 | 0.0700  | 0.0175 | 81.94%  | 0.0442  | 0.0373 | 18.06% | -0.0658 | 0.1986 |
| 8  | rs7831810   | <i>GULOP</i>                      | A | -0.0736 | 0.0138 | -0.0765 | 0.0146 | 84.89%  | -0.0248 | 0.0346 | 15.11% | -0.0790 | 0.1826 |
| 21 | rs3017432   | <i>ADAMTS1</i>                    | T | -0.0735 | 0.0155 | -0.0735 | 0.0151 | 100.00% | -       | -      | -      | -0.1106 | 0.1900 |

|    |            |                          |   |         |        |         |        |         |         |        |        |         |        |
|----|------------|--------------------------|---|---------|--------|---------|--------|---------|---------|--------|--------|---------|--------|
| 16 | rs4985557  | <i>MTSS2</i>             | T | 0.0734  | 0.0140 | 0.0652  | 0.0146 | 86.47%  | 0.0544  | 0.0369 | 13.53% | 0.0193  | 0.1892 |
| 1  | rs12118278 | <i>KIF21B</i>            | A | 0.0730  | 0.0169 | 0.0798  | 0.0186 | 78.28%  | 0.0212  | 0.0353 | 21.72% | 0.1106  | 0.1836 |
| 16 | rs4782284  | <i>IQCK</i>              | A | 0.0727  | 0.0175 | 0.0827  | 0.0189 | 81.46%  | 0.0126  | 0.0396 | 18.54% | 0.0406  | 0.2162 |
| 7  | rs60738304 | <i>ZCWPW1</i>            | A | -0.0711 | 0.0149 | -0.0700 | 0.0160 | 81.74%  | -0.0330 | 0.0339 | 18.26% | -0.1035 | 0.1740 |
| 19 | rs8111708  | <i>ELL</i>               | A | -0.0704 | 0.0144 | -0.0696 | 0.0151 | 86.16%  | -0.0326 | 0.0377 | 13.84% | -0.1536 | 0.2000 |
| 5  | rs11168036 | <i>PFDN1</i>             | T | 0.0701  | 0.0135 | 0.0754  | 0.0143 | 84.35%  | 0.0182  | 0.0332 | 15.65% | 0.1689  | 0.1767 |
| 6  | rs12197146 | <i>CD2AP</i>             | T | 0.0674  | 0.0148 | 0.0674  | 0.0144 | 100.00% | -       | -      | -      | 0.0377  | 0.2149 |
| 7  | rs11769980 | <i>EPHA1-ASI</i>         | A | -0.0668 | 0.0145 | -0.0684 | 0.0148 | 91.11%  | -0.0222 | 0.0474 | 8.89%  | -0.1691 | 0.2370 |
| 1  | rs12030051 | <i>EIF4G3</i>            | A | 0.0667  | 0.0146 | 0.0661  | 0.0153 | 86.41%  | 0.0307  | 0.0386 | 13.59% | -0.0354 | 0.2116 |
| 11 | rs11607586 | <i>UBASH3B</i>           | T | 0.0663  | 0.0153 | 0.0527  | 0.0164 | 82.76%  | 0.0569  | 0.0359 | 17.24% | 0.2038  | 0.2008 |
| 11 | rs12284553 | <i>NTM, LOC107984413</i> | A | 0.0661  | 0.0137 | 0.0617  | 0.0144 | 85.72%  | 0.0401  | 0.0353 | 14.28% | -0.2327 | 0.1993 |
| 10 | rs7358283  | <i>SH2D4B</i>            | A | 0.0652  | 0.0154 | 0.0656  | 0.0164 | 83.32%  | 0.0273  | 0.0367 | 16.68% | -0.0775 | 0.1774 |
| 11 | rs12798036 | <i>AP2A2</i>             | T | -0.0638 | 0.0143 | -0.0614 | 0.0152 | 83.77%  | -0.0330 | 0.0345 | 16.23% | 0.0975  | 0.1776 |
| 3  | rs59930643 | <i>ADCY5</i>             | A | -0.0633 | 0.0147 | -0.0586 | 0.0155 | 85.19%  | -0.0390 | 0.0372 | 14.81% | 0.1151  | 0.1903 |
| 6  | rs1265759  | <i>TSBP1, TSBP1-ASI</i>  | T | -0.0630 | 0.0141 | -0.0671 | 0.0150 | 83.17%  | -0.0188 | 0.0333 | 16.83% | 0.0298  | 0.1829 |
| 20 | rs6076600  | <i>RPL21P2</i>           | A | 0.0619  | 0.0150 | 0.0563  | 0.0154 | 89.24%  | 0.0469  | 0.0444 | 10.76% | -0.0426 | 0.2129 |
| 1  | rs7536204  | <i>USP24</i>             | A | -0.0607 | 0.0141 | -0.0641 | 0.0148 | 86.37%  | -0.0170 | 0.0373 | 13.63% | 0.0069  | 0.1864 |
| 2  | rs1446445  | <i>LOC105369165</i>      | A | 0.0572  | 0.0136 | 0.0557  | 0.0143 | 85.12%  | 0.0286  | 0.0342 | 14.88% | 0.0751  | 0.1769 |
| 2  | rs6722041  | <i>FSIP2</i>             | T | -0.0569 | 0.0135 | -0.0636 | 0.0143 | 84.49%  | -0.0090 | 0.0334 | 15.51% | -0.0768 | 0.1761 |
| 9  | rs2480497  | <i>LOC105376137</i>      | T | -0.0568 | 0.0134 | -0.0549 | 0.0142 | 84.53%  | -0.0291 | 0.0332 | 15.47% | -0.0959 | 0.1711 |
| 3  | rs614004   | <i>CMTM7</i>             | A | -0.0562 | 0.0134 | -0.0538 | 0.0141 | 84.78%  | -0.0302 | 0.0333 | 15.22% | -0.0478 | 0.1735 |

Statistical values were obtained from <sup>1</sup>a meta-GWAS, <sup>2</sup>previous studies [5, 6], and <sup>3</sup>our dataset 1.

<sup>4</sup>Proportion of SNP's weight of each cohort for the inverse-variance weighted model (METAL)

Abbreviations: NCGG, National Center for Geriatrics and Gerontology; IGAP, International Genomics of Alzheimer's Project; CHR, chromosome; SNP, single-nucleotide polymorphism; SE, standard error; EA, effect allele; PRS, polygenic risk score.

**eTable 4.** Characteristics of SNVs selected for Japanese-based PRS.

| CHR | SNP         | Nearest gene | EA | Japanese [6] (NCGG) | Korean           | Japanese [6] (NCGG) |                 | Korean (our dataset 1) |                 |
|-----|-------------|--------------|----|---------------------|------------------|---------------------|-----------------|------------------------|-----------------|
|     |             |              |    | EAF <sup>1</sup>    | EAF <sup>1</sup> | Beta <sup>2</sup>   | SE <sup>2</sup> | Beta <sup>3</sup>      | SE <sup>3</sup> |
| 11  | rs117807585 | <i>SORL1</i> | A  | 0.2302              | 0.2167           | -0.2619             | 0.0789          | -0.2559                | 0.1480          |

Statistical values and <sup>1</sup>EAF were obtained from <sup>2</sup>a previous study [6] and <sup>3</sup>our dataset 1. Abbreviations: NCGG, National Center for Geriatrics and Gerontology; CHR, chromosome; SNP, single-nucleotide polymorphism; SE, standard error; EAF, effect allele frequency; PRS, polygenic risk score.

**eTable 5.** Predictive accuracy of PRSs derived from European, Japanese, and trans-ancestry meta-GWAS.

| ADD diagnosis                | Dataset 1 (CU (n=479) vs. ADD (n=544)) |                |                                          | Dataset 2 (CU (n=220) vs. ADD (n=159)) |                |                                          |
|------------------------------|----------------------------------------|----------------|------------------------------------------|----------------------------------------|----------------|------------------------------------------|
|                              | <sup>1</sup> OR<br>(95% CI)            | <sup>1</sup> P | <sup>2</sup> Nagelkerke's R <sup>2</sup> | <sup>1</sup> OR<br>(95% CI)            | <sup>1</sup> P | <sup>2</sup> Nagelkerke's R <sup>2</sup> |
| European GWAS<br>(IGAP)      | 1.95 (1.40–2.72)                       | <.001          | 0.020                                    | 1.85 (1.05–3.32)                       | .04            | 0.026                                    |
| Japanese GWAS<br>(NCGG)      | 2.71 (1.16–6.40)                       | .02            | 0.006                                    | 3.26 (0.71–<br>15.55)                  | .13            | 0.006                                    |
| Trans-ancestry meta-<br>GWAS | 1.69 (1.31–2.19)                       | <.001          | 0.023                                    | 2.09 (1.09–4.04)                       | .03            | 0.032                                    |

<sup>1</sup>The OR and *P* values for PRS were calculated using multivariable logistic regression model after adjusting sex, age, education year, four PCs of genetic data, and *APOE* ε4 status.

<sup>2</sup>Variance explained by PRS.

Abbreviations: CU, cognitively unimpaired; ADD, Alzheimer's disease dementia; OR, odds ratio; CI, confidence interval; GWAS, genome-wide association study; PRS, polygenic risk score; IGAP, European International Genomics of Alzheimer's Project; NCGG, National Center for Geriatrics and Gerontology; PC, principal component.

**A.**

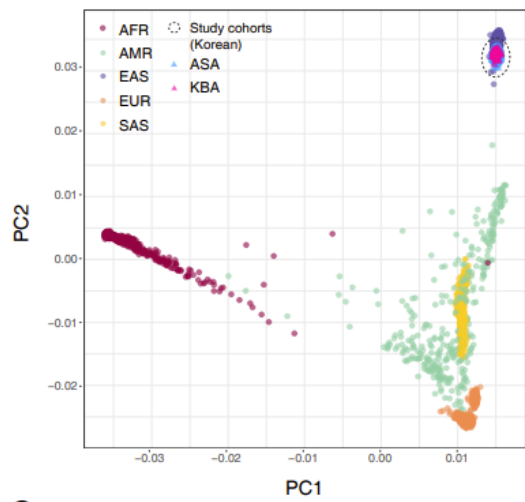

**B.**

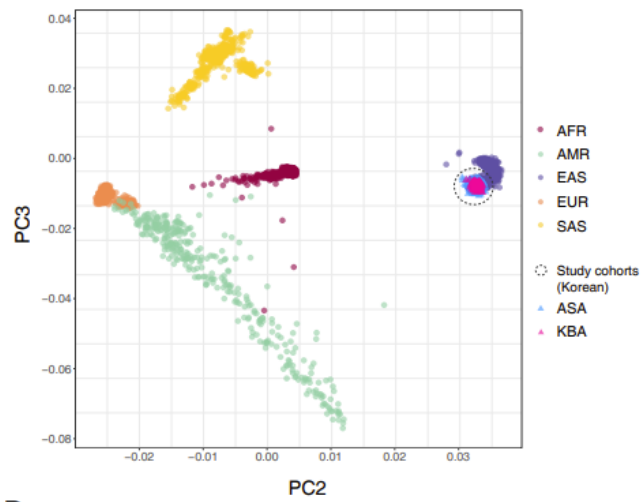

**C.**

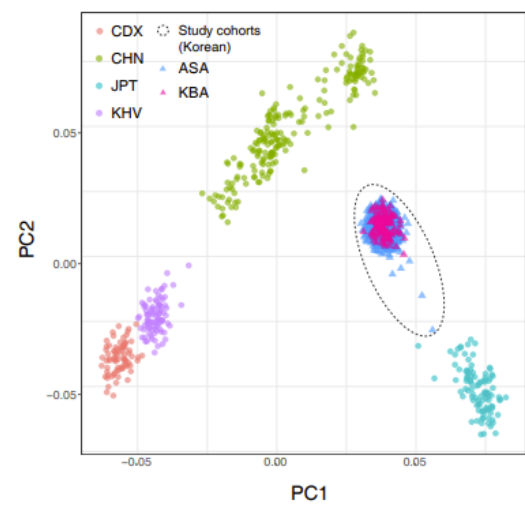

**D.**

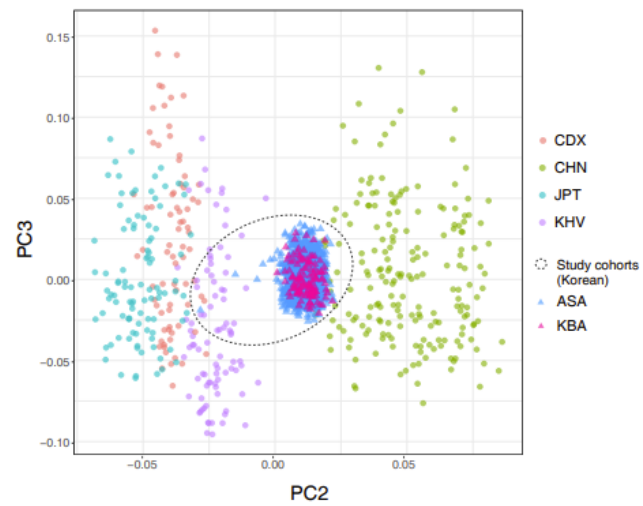

**E.**

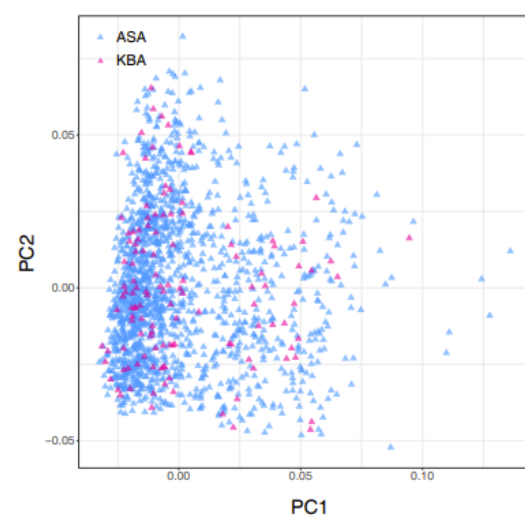

**F.**

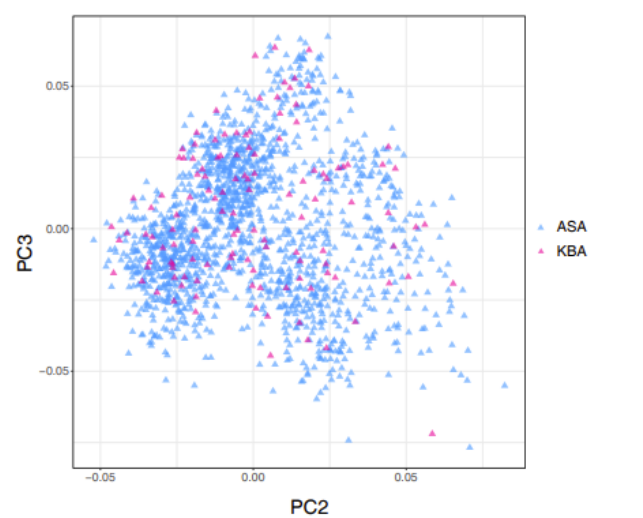

**eFigure 1.** Principal component analysis comparison of the Korean study cohorts and the 1000 Genomes Project populations. The first three PCs of genetic ancestry are presented. Each dot represents an individual from the ethnic group represented by different colours. **(A), (B)** PCs of the 1000 Genomes Project dataset (circle; AFR, AMR, EAS, EUR, and SAS) and the current study cohorts (triangle; ASA and KBA). **(C), (D)** PCs of the 1000 Genomes Project East Asian dataset (circle; CDX, CHN, JPT, and KHV) and the current study cohorts (triangle; ASA and KBA). **(E), (F)** PCs of ASA and KBA samples from independent PCA without projection to the 1000 Genomes Project. Abbreviations: PC, principal component; ASA, Illumina Asian Screening Array BeadChip (Korean study cohorts); KBA, Affymetrix Axiom Korea Biobank Array (Korean study cohorts); AFR, African; AMR, American; EAS, East Asian; EUR, European; SAS, South Asian; CDX, Chinese Dai in Xishuangbanna, Chinese; CHN, Han Chinese in Beijing, Chinese; JPT, Japanese in Tokyo, Japan; KHV, Kinh in Ho Chi Minh City, Vietnam.



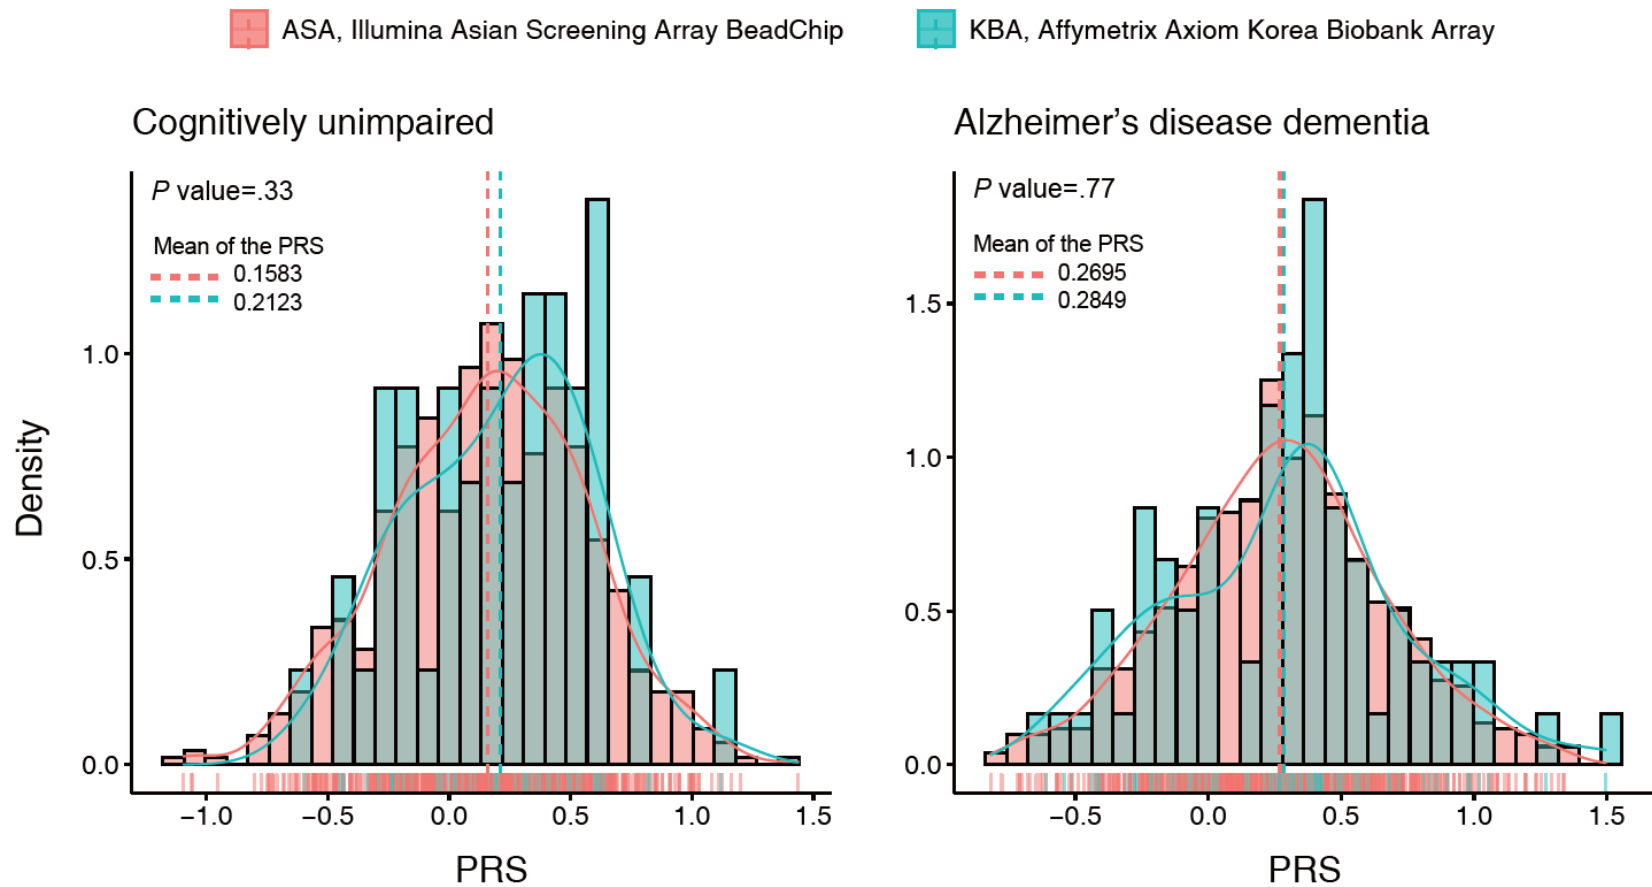

**eFigure 2.** PRS distributions among the study participants according to the genotyping arrays. Abbreviations: ASA, Illumina Asian Screening Array BeadChip; KBA, Affymetrix Axiom Korea Biobank Array; PRS, polygenic risk score.

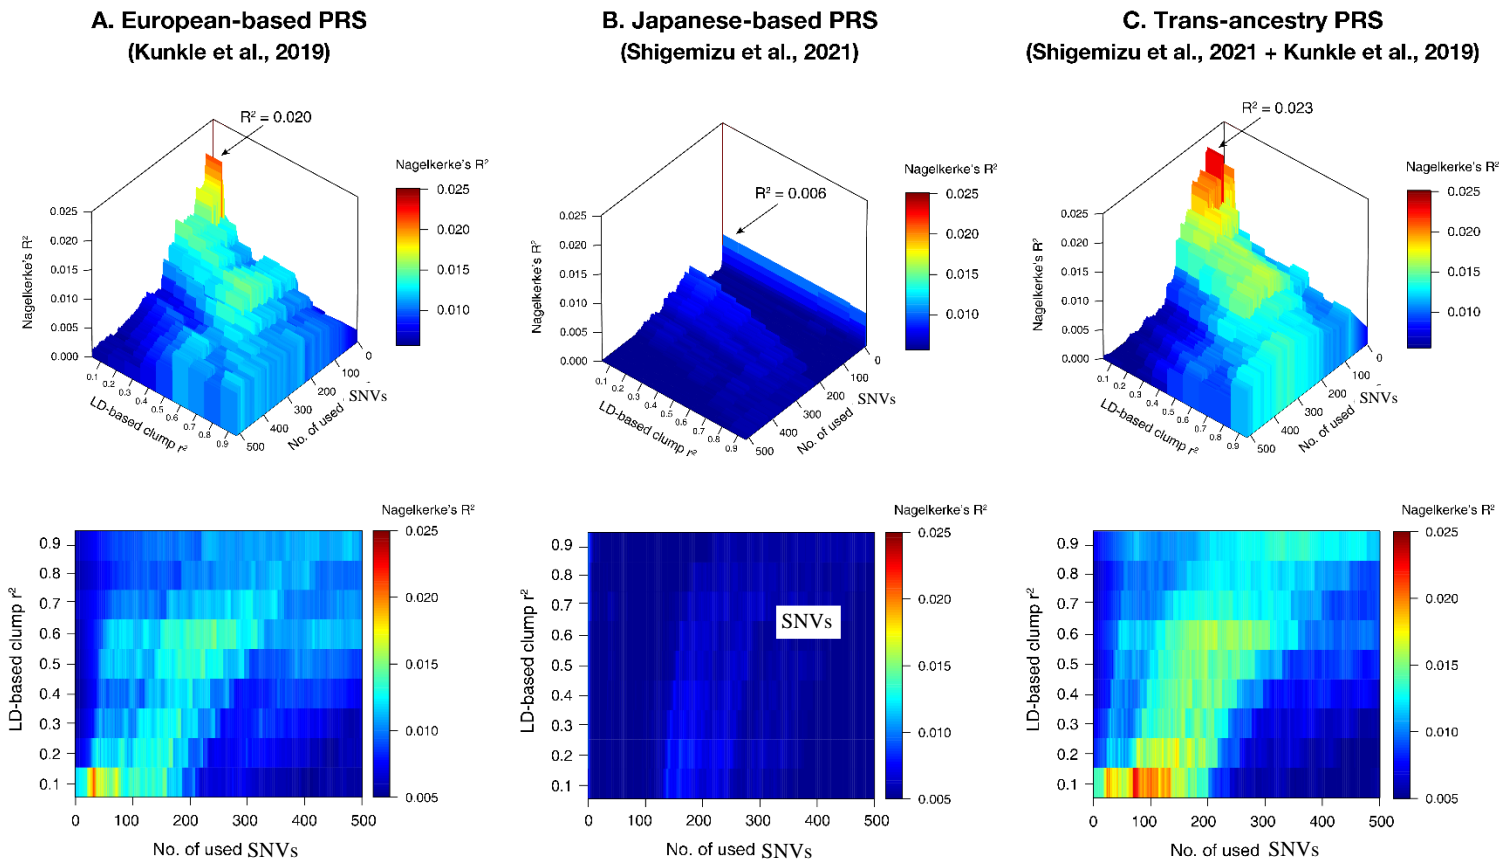

**eFigure 3.** Distribution plots for Nagelkerke's  $R^2$  values of each population-based PRS across the SNP selection thresholds.

Abbreviations: PRS, polygenic risk score; SNP, single-nucleotide polymorphism; LD, linkage disequilibrium.

**A.**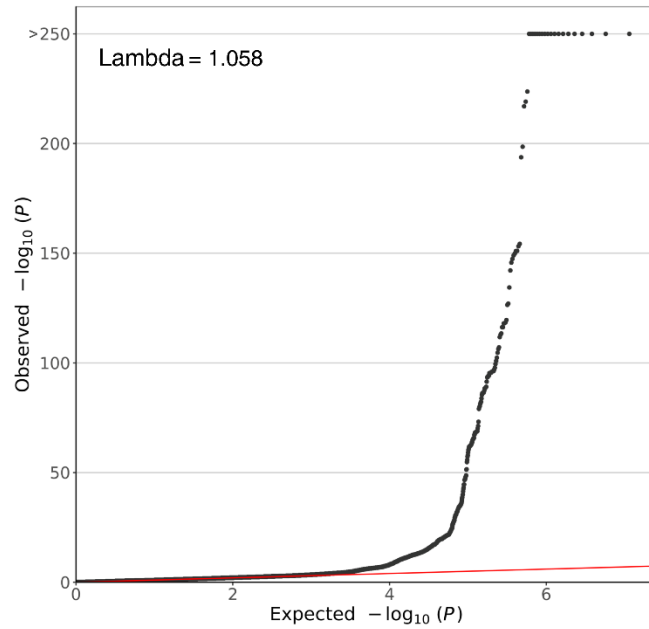**B.**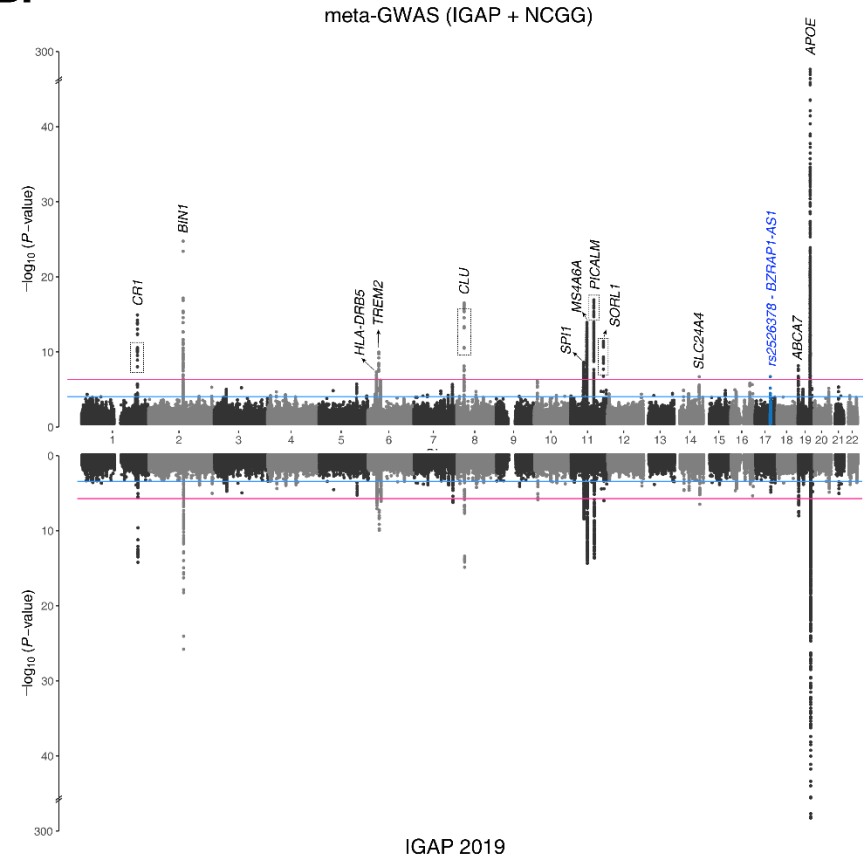

**eFigure 4.** (A) Quantile-quantile plot (B) Miami plot for the trans-ancestry meta-GWAS. The red and blue lines indicate the genome-wide significance level ( $P=5.0 \times 10^{-8}$ ) and the genome-wide suggestive level ( $P=1.0 \times 10^{-5}$ ), respectively. A locus near rs2526378 on chromosome 17 were newly identified in the trans-ancestry meta-GWAS.

Abbreviations: IGAP, International Genomics of Alzheimer's Project; NCGG, National Center for Geriatrics and Gerontology.

## eReferences

- [1] Price, A. L., Patterson, N. J., Plenge, R. M., Weinblatt, M. E., Shadick, N. A., & Reich, D. (2006). Principal components analysis corrects for stratification in genome-wide association studies. *Nature genetics*, **38**(8), 904-909.
- [2] Manichaikul, A., Mychaleckyj, J. C., Rich, S. S., Daly, K., Sale, M., & Chen, W. M. (2010). Robust relationship inference in genome-wide association studies. *Bioinformatics*, **26**(22), 2867-2873.
- [3] Villemagne, V. L., Ong, K., Mulligan, R. S., Holl, G., Pejoska, S., Jones, G., ... & Rowe, C. C. (2011). Amyloid imaging with 18F-florbetaben in Alzheimer disease and other dementias. *Journal of Nuclear Medicine*, **52**(8), 1210-1217.
- [4] Curtis, C., Gamez, J. E., Singh, U., Sadowsky, C. H., Villena, T., Sabbagh, M. N., ... & Salloway, S. (2015). Phase 3 trial of flutemetamol labeled with radioactive fluorine 18 imaging and neuritic plaque density. *JAMA neurology*, **72**(3), 287-294.
- [5] Kunkle, B. W., Grenier-Boley, B., Sims, R., Bis, J. C., Damotte, V., Naj, A. C., ... & Rotter, J. I. (2019). Genetic meta-analysis of diagnosed Alzheimer's disease identifies new risk loci and implicates A $\beta$ , tau, immunity and lipid processing. *Nature genetics*, **51**(3), 414-430.
- [6] Shigemizu, D., Mitsumori, R., Akiyama, S., Miyashita, A., Morizono, T., Higaki, S., ... & Ozaki, K. (2021). Ethnic and trans-ethnic genome-wide association studies identify new loci influencing Japanese Alzheimer's disease risk. *Translational psychiatry*, **11**(1), 1-10.
